# Supplementary material for: Characterization of a Missense Mutation in the Catalytic Domain and a Splicing Mutation of Coagulation Factor X Compound Heterozygous in a Chinese Pedigree
Source: MDPI journal article supplement (doi:10.3390/genes12101521), 2021-09-27
Supplement: s1 [file s1]

**Supplementary Table S1** PCR primers and sequence in “Materials and methods”.

| Aim                                                 | PCR primers      | sequence (5'-3')          |
|-----------------------------------------------------|------------------|---------------------------|
| For gene analysis of the proband and family members | FX-0F            | GATGGTCACGGGAAGGTCAC      |
|                                                     | FX-0R            | TTTTGGGTCTGAAGGGCGAG      |
|                                                     | FX-1F            | CTGGAAACTACAAAATGAGCACGA  |
|                                                     | FX-1R            | CCCAGGGAGCCACAGC          |
|                                                     | FX-2F            | AGGAAGAAATAATGAGGCGTGTG   |
|                                                     | FX-2R            | TCGCCGGGAAGGAGTCA         |
|                                                     | FX-3F            | TGACTGAAGCCACATCTTCACAG   |
|                                                     | FX-3R            | GTTTTTTGCTTTTACCGAATACT   |
|                                                     | FX-4F            | CCATCCTTCCAGTTGGTCCC      |
|                                                     | FX-4R            | TTTGGGGGACATATTGGGGC      |
|                                                     | FX-5F            | GCCTGGCTTCTGGCTACAC       |
|                                                     | FX-5R            | GGAAGCTGAGGTTAAACAGC      |
|                                                     | FX-6F            | TCCATTGTTACAGGCGGTC       |
|                                                     | FX-6R            | TGGAGCTCACAGCCTCCTT       |
|                                                     | FX-7F            | TGTGTCGTGTGCATGAGACTT     |
|                                                     | FX-7R            | GAAGGGCTGGGCTGGTTC        |
|                                                     | FX-8F            | AACGTGTGAGACAGGACCAG      |
|                                                     | FX-8R            | ATCTGGGGAAAGGAATGCC       |
| For patient's periphery FX ectopic transcript       | F10-E2-F         | ACGAGGGCCAATTCCTTTCTTG    |
|                                                     | F10-E8-1R        | CCTCCTGCTTGGTGTCTAGCC     |
|                                                     | F10-E4-F         | GCACCTGTTTAGAAGGATTCGAAG  |
|                                                     | F10-3UTR-2R      | GAGACAAACCAGGCCTTGAGTG    |
|                                                     | F10-E6-F         | CAACCAGACGCAGCCTGAGAG     |
|                                                     | F10-3UTR-3R      | GATGCAGGAAGGTATCTGGGGA    |
| For the construction of minigene pcMINI-FX-WT/Mut   | 23591-F10-F      | CTGGAGGGCTCACTGGAGGG      |
|                                                     | 26022-F10-R      | GGACATGCTCTCGCACATCCG     |
|                                                     |                  | GGTAGGTACCTGTTTCTGCACAGA  |
|                                                     | MINI-F10-KpnI-F  | CTGGCGTC                  |
|                                                     |                  | TAGTGGATCCGCATTTGTAGCTTGT |
|                                                     | MINI-F10-BamHI-R | GTTGGG                    |
